# Supplementary material
Source: PubMed Central journal article supplement (PMC539161)
Supplement: mbc_E04-03-0260_1.pdf [file mbc_E04-03-0260_1.pdf]

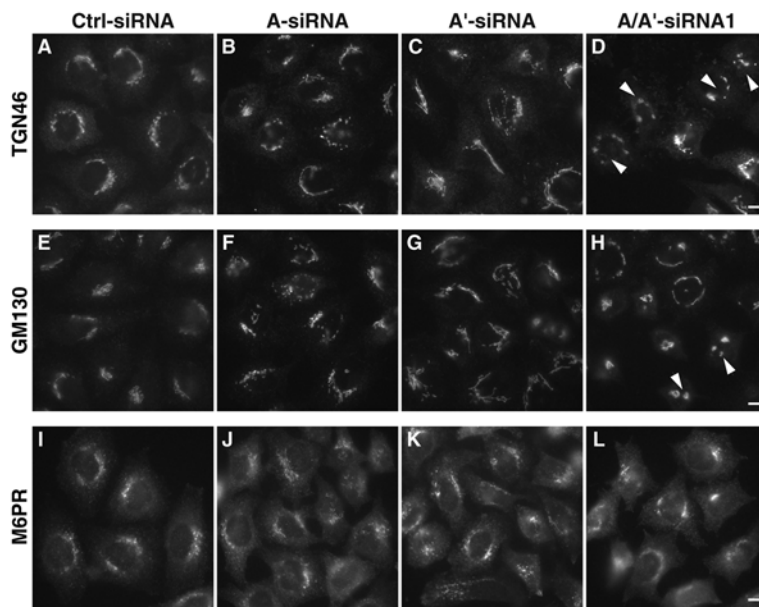

## Supplemental Data

Young et al.,

### Supplemental Figures

#### Figure Legends

Supplemental Figure S1. **Suppression of rab6A and A' alters Golgi morphology.** HeLa cells were transfected with control (A, E, I), rab6A-specific (B, F, J), rab6A'-specific (C, G, K) or rab6A/A' siRNAs (D, H, L) twice during 92h and fixed. Cells were stained with antibodies directed to TGN46 identifying the TGN compartment (A-D), GM130 which is enriched at the *cis*-cisternae of the Golgi (E-H) and M6PR, a marker protein that shuttles between early endosomes and the TGN (I-L). Note that the dynamic protein M6PR retained its perinuclear staining pattern in the rab6A/A'-siRNA treated cells similar to control treated cells. Bar, 10 $\mu$ m.
